# Supplementary material for: VPg Impact on Ryegrass Mottle Virus Serine-like 3C Protease Proteolysis and Structure
Source: MDPI journal article supplement (doi:10.3390/ijms24065347), 2023-03-10
Supplement: s1 [file s1]

**Supplementary Data**

**VPg impact on ryegrass mottle virus serine-like 3C protease proteolysis and structure**

**Gints Kalnins<sup>1†</sup>, Rebeka Ludviga<sup>2†</sup>, Ieva Kalnciema<sup>3</sup>, Gunta Resevica<sup>3</sup>, Vilija Zeltina<sup>3</sup>, Janis Bogans<sup>4</sup>, Kaspars Tars<sup>1</sup>, Andris Zeltins<sup>3</sup>, Ina Balke<sup>2\*</sup>**

<sup>1</sup> Structural biology group, Latvian Biomedical Research and Study Centre, Ratsupites street 1, k-1, Riga LV-1067, Latvia

<sup>2</sup> Plant virus protein research group, Latvian Biomedical Research and Study Centre, Ratsupites street 1, k-1, Riga LV-1067, Latvia

<sup>3</sup> Plant Virology group, Latvian Biomedical Research and Study Centre, Ratsupites street 1, k-1, Riga LV-1067, Latvia

<sup>4</sup> Biotechnology core facility, Latvian Biomedical Research and Study Centre, Ratsupites street 1, k-1, Riga LV-1067, Latvia

\* Correspondence: inab@biomed.lu.lv

† These authors contributed equally to this work.

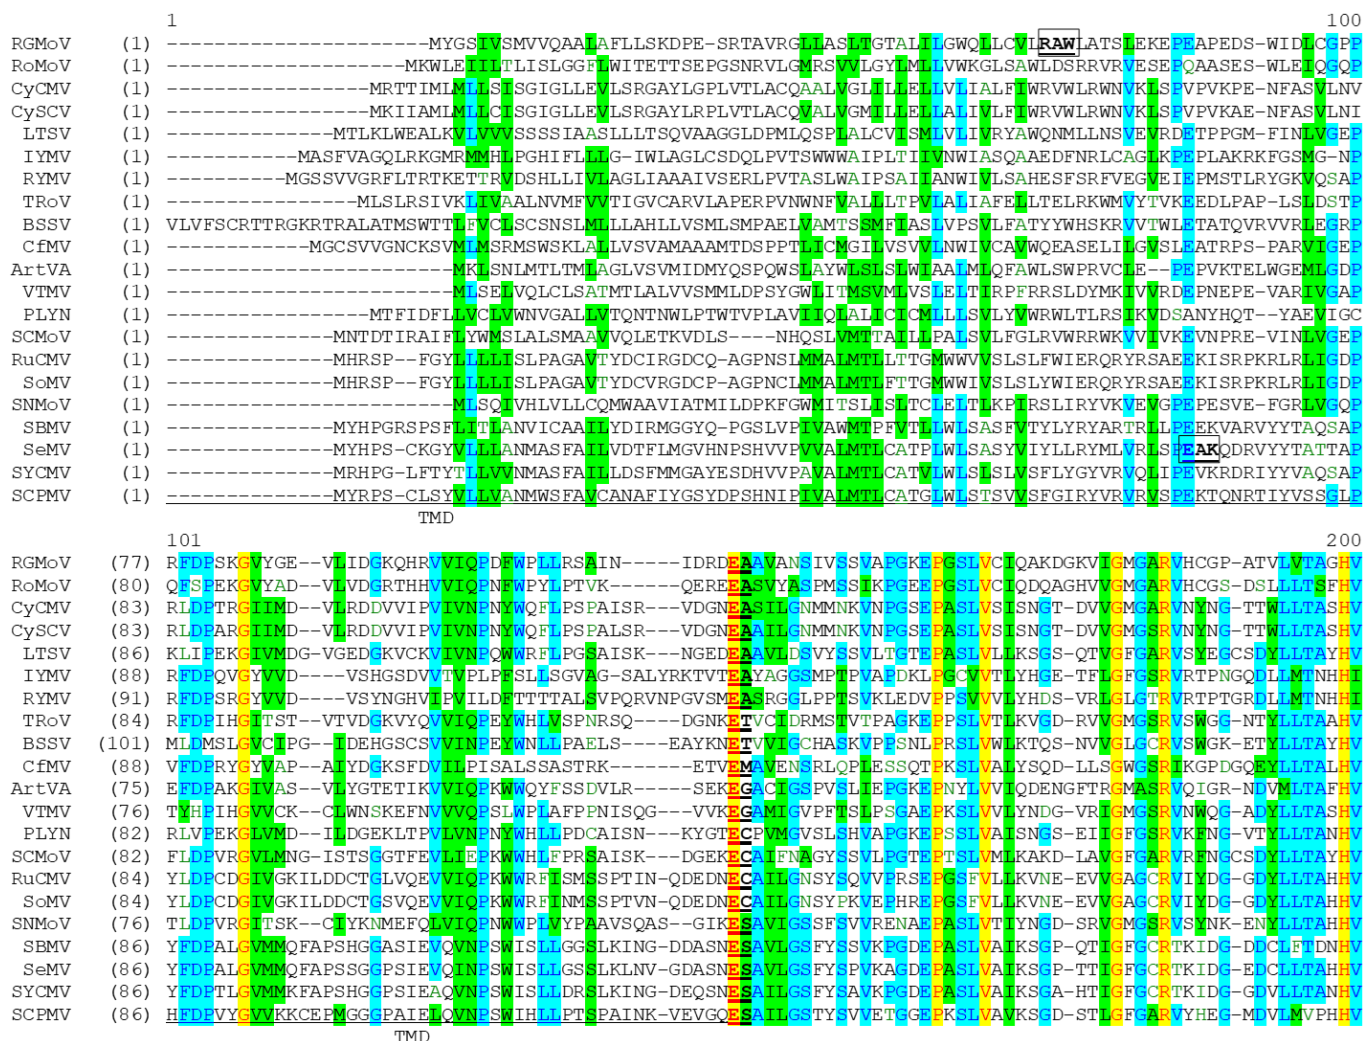

**Figure S1.** Sobemovirus Pro N-terminal part aa alignment. Artemisia virus A (ArtVA\_NC\_017914), blueberry shoestring virus (BSSV\_NC\_029578), cocksfoot mottle virus (CfMV\_NC\_002618), Cymbidium chlorotic mosaic virus (CyCMV\_NC\_027123), Cymbidium chlorotic spot virus (CyCSV\_KR996515), Imperata yellow mottle virus (IYMV\_NC\_011536), lucerne transient streak virus (LTSV\_NC\_001696), papaya lethal yellowing virus (PLYV\_NC\_018449), ryegrass mottle virus (RGMoV\_EF091714), Rottboellia yellow mottle virus (RoMoV\_NC\_027198), Rubus chlorotic mottle virus (RuCMV\_NC\_011187), rice yellow mottle virus (RYMV\_NC\_001575), southern bean mosaic virus (SBMV\_NC\_004060), subterranean clover mottle virus (SCMoV\_NC\_004346), southern cowpea mosaic virus (SCPMV\_NC\_001625), Sesbania mosaic virus (SeMV\_NC\_002568), Solanum nodiflorum mottle virus (SNMoV\_KC577470), sowbane mosaic virus (SoMV\_GQ845002), soybean yellow common mosaic virus (SYCMV\_KX096577), turnip rosette virus (TRoV\_AY177608), velvet tobacco mottle virus (VTMoV\_NC\_014509). **RAW** & **EAK**: start position of *E. coli* expressed Pro; underlined: transmembrane domain (TMD); **EA**: protease cleavage site for TMD.

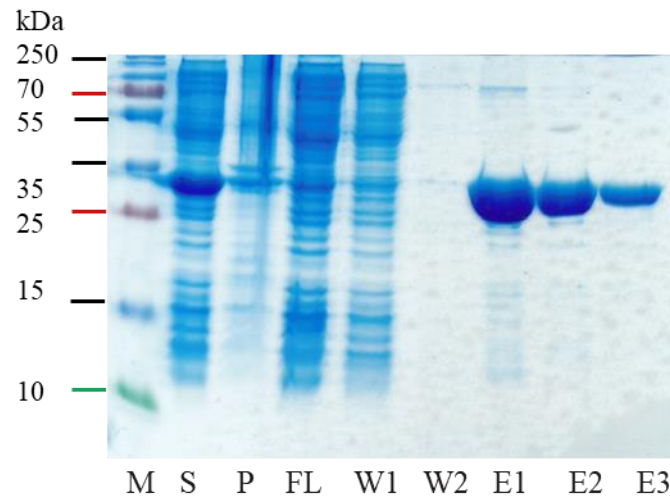

**Figure S2.**  $\Delta 50\text{Pro}^{\text{cm}}$  cleavage test *in cis*. M: protein marker (Page Ruler Plus, Thermo Fisher Scientific); S: soluble protein fraction; P: pellet; FL: flow fraction after IMAC column; W1: first wash; W2: second wash; E1: first elution fraction; E2: second elution fraction; E3: third elution fraction.

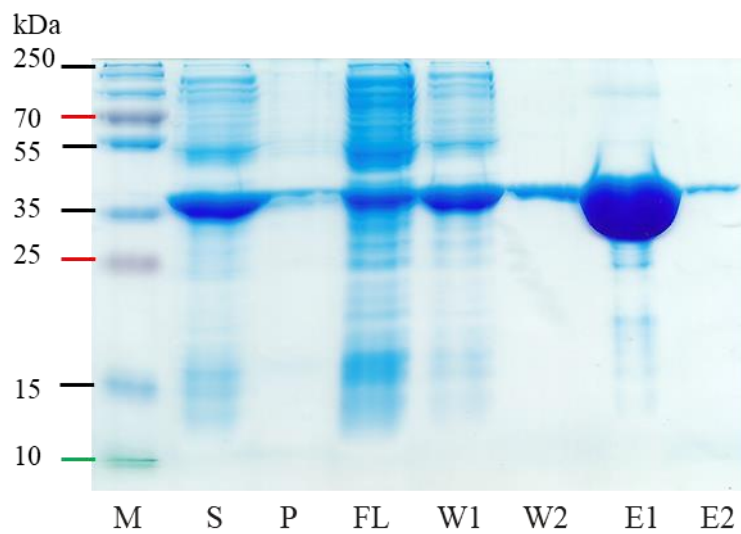

**Figure S3.**  $\Delta 50\text{Pro}^{\text{cm}}$ -VPg cleavage test *in trans*. M: protein marker (Page Ruler Plus, Thermo Fisher Scientific); S: soluble protein fraction; P: pellet; FL: flow fraction after IMAC column; W1: first wash; W2: second wash; E1: first elution fraction; E2: second elution fraction.

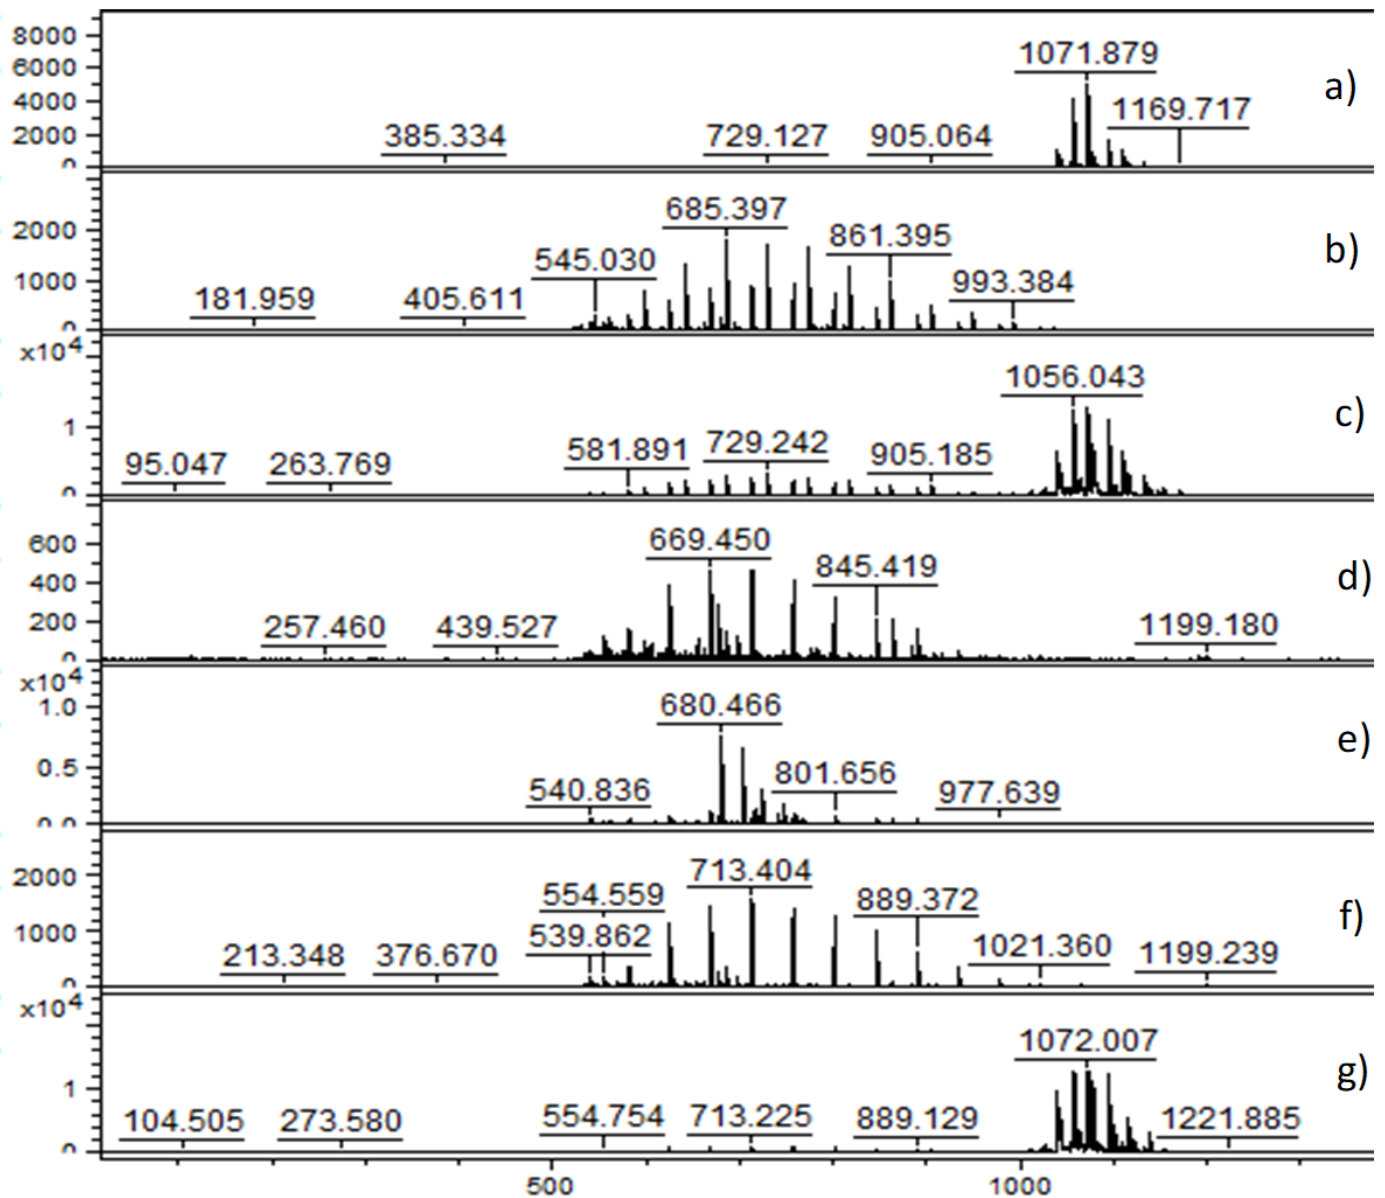

**Figure S4.** Mass spectrometry analysis of peptide cleavage. A: patterns of the synthetic peptide (Abz-RDE/AAVK(Dnp)-NH<sub>2</sub>, MW 1072.9 Da, Pepscan) in the peptide range; c: patterns of  $\Delta$ 117Pro<sup>cm</sup> (S<sup>159</sup> was mutated to A) in the peptide range; d: patterns of the synthetic peptide and  $\Delta$ 117Pro<sup>cm</sup> in the peptide range; e: patterns of  $\Delta$ 117Pro in peptide range; f: patterns of the synthetic peptide and  $\Delta$ 117Pro in the peptide range; g: patterns of the synthetic peptide and  $\Delta$ 117Pro in the peptide range with 20 mM DTT.

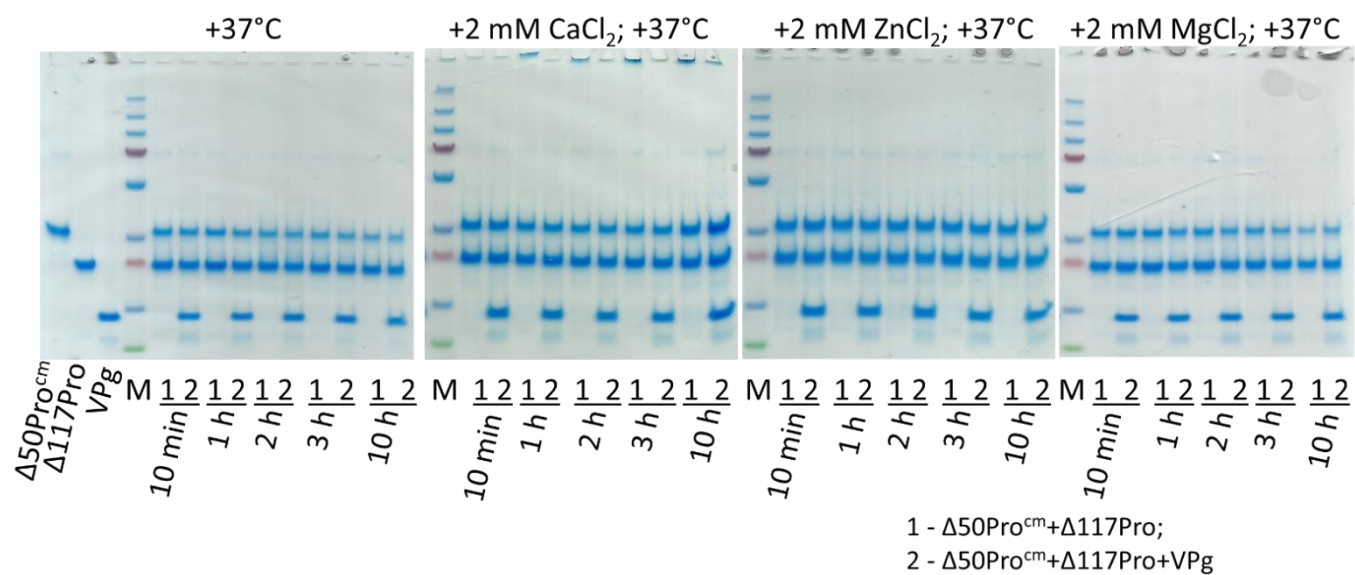

**Figure S5.** *In vitro in cis* cleavage test of Δ50Pro<sup>cm</sup>, Δ117Pro and VPg. M: protein marker (Page Ruler Plus, Thermo Fisher Scientific).

A

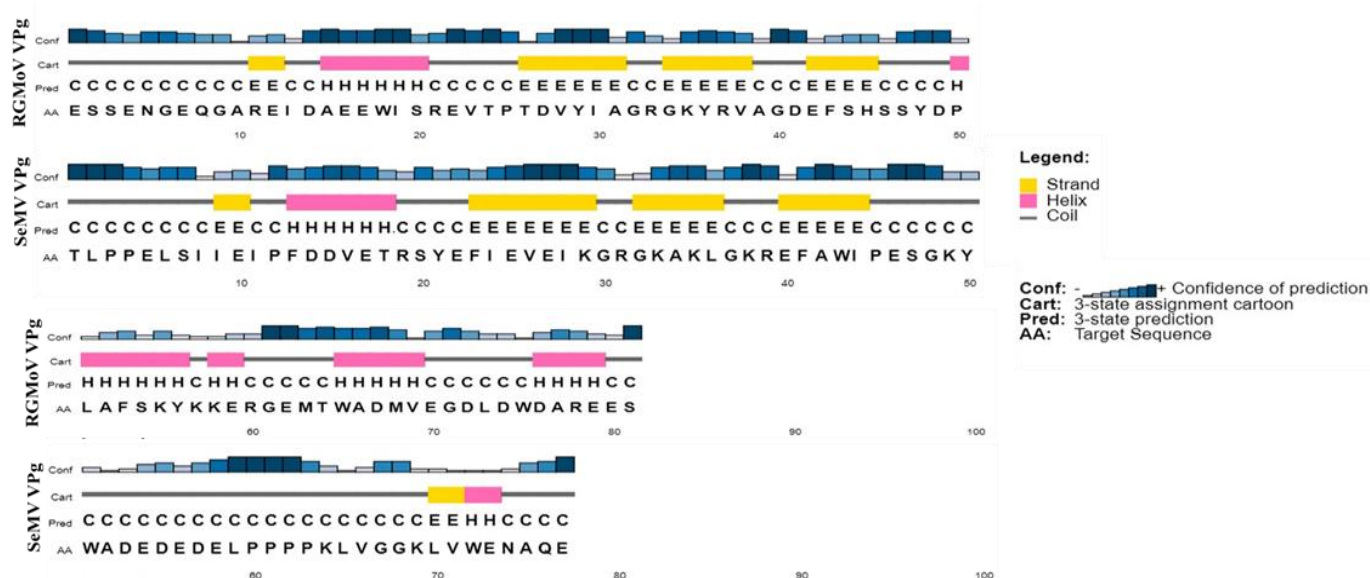

B

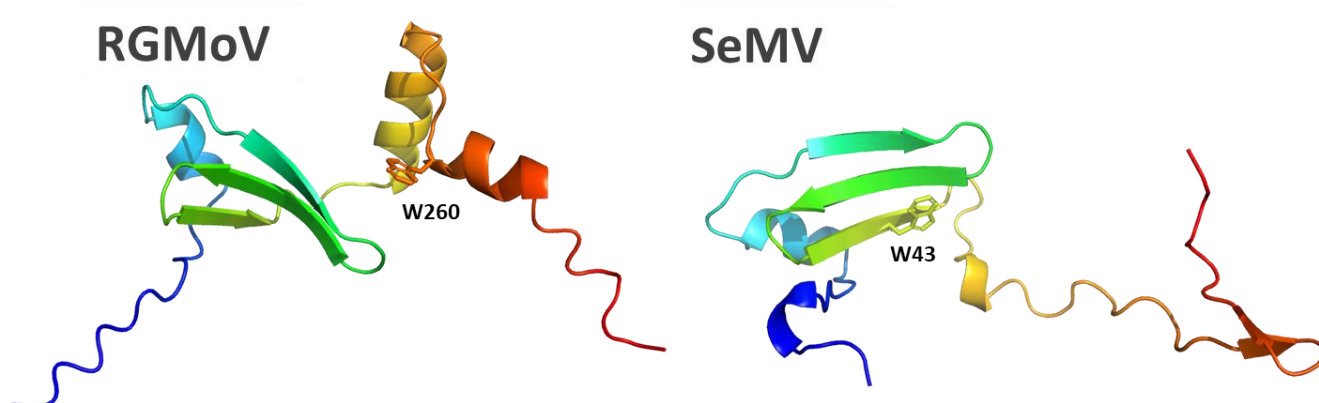

**Figure S6. *In silico* analysis of RGMoV and SeMV VPg sequences.** A: RGMoV and SeMV VPg secondary structure element determination by PsiPred [1] (C: coil; E: strand; H: helix); B: RGMoV and SeMV VPg 3D structure determination by AlphaFold [2], key interacting residues are selected as a stick model.

## References

1. Jones, D.T. Protein secondary structure prediction based on position-specific scoring matrices. *J Mol Biol* **1999**, 292, 195-202.
2. Jumper, J.; Evans, R.; Pritzel, A.; Green, T.; Figurnov, M.; Ronneberger, O.; Tunyasuvunakool, K.; Bates, R.; Zidek, A.; Potapenko, A., *et al.* Highly accurate protein structure prediction with alphafold. *Nature* **2021**, 596, 583-589.

**Table S1.** List of used oligonucleotides (primers).

| Construct            | Primer                | Primer sequence                                                              |
|----------------------|-----------------------|------------------------------------------------------------------------------|
| N6H-Δ50Pro-E/A-VPg   | RG-SerP-RAW-NdeI-F    | 5' CCA TAT GCG CGC TTG GCT AGC AAC CTC TCT GGA 3'                            |
|                      | RG-SP-VPg-E/A-R       | 5' TCC CTG CTC TCC GTT TGC ACT GGA TGC ACA GTT TGC ATG GAA AAT 3'            |
|                      | RG-SP-VPg-E/A-F       | 5' ATT TTC CAT GCA AAC TGT GCA TCC AGT GCA AAC GGA GAG CAG GGA 3'            |
|                      | RG2-VPg-HindIII-R     | 5' AAG CTT TCA TTC TTC ACG GGC GTC CCA ATC A 3'                              |
|                      | RG-VPg-P16-EcoRI-F    | 5' TGA ATT CTC CCA CTC AAG TTA TGA TCC TCT GGCT 3'                           |
| N6H-Δ50Pro-TMD-E/A   | RGSP-E/A-R            | 5' AGC CAC AGC AGC AGC ATC ACG ATC T 3'                                      |
|                      | RGSP-E/A-F            | 5' AGA TCG TGA TGC TGC TGC TGT GGC T 3'                                      |
|                      | RGSP-XhoI-R           | 5' AGT GGA CTC GAG CCC CCA TCC CA 3'                                         |
| VPg-P16-C6H          | RG-P16-C6H-HindIII-R  | 5' CAA GCT TTC AGT GAT GAT GAT GAT GAT GAG CTG AGG GGG ACC CCT GGA 3'        |
|                      | RG2-VPg-NcoI-F        | 5' CCA TGG GA AAC GGA GAG CAG GGA GCG CGC GA 3'                              |
| VPg-E/A-P16-C6H      | RG-VPg-E/A-P16-F      | 5' TGA AGC GTC CAC AGG AAA TGA TAT TCC TTT AAA CT 3'                         |
|                      | RG-VPg-E/A-P16-R      | 5' AGT TTA AAG GAA TAT CAT TTC CTG TGG ACG CTT CA 3'                         |
|                      | RG2-VPg-NcoI-F        | 5' CCA TGG GA AAC GGA GAG CAG GGA GCG CGC GA 3'                              |
|                      | RG-VPg-P16-EcoRI-F    | 5' TGA ATT CTC CCA CTC AAG TTA TGA TCC TCT GGC T 3'                          |
| Δ50Pro-C6H           | Pro-C-6-His-HindIII-R | 5' AAG CTT TCA GTG ATG ATG ATG ATG ATG TTC ACT GGA TTC ACA GTT TGC ATG GA 3' |
|                      | RG-SerP-RAW-NcoI-F    | 5' CCA TGG CTC GCG CTT GGC TAG CAA CCT CTCTGGA 3'                            |
| Δ50Pro-VPg-wt-C6H    | VPg-C-6-His-HindIII-R | 5' AAG CTT TCA GTG ATG ATG ATG ATG ATG TTC TTC ACG GGC GTC CCA ATCA 3'       |
|                      | RG-SerP-RAW-NcoI-F    | 5' CCA TGG CTC GCG CTT GGC TAG CAA CCT CTC TGG A 3'                          |
|                      | RG2-SerP-HindIII-R    | 5' AAG CTT TCA TTC ACT GGA TTC ACA GTT TGC ATG GAA AAT GGA GA 3'             |
| Δ50Pro-N6H           | RG-SerP-RAW-NdeI-F    | 5' CCA TAT GCG CGC TTG GCT AGC AAC CTC TCT GGA 3'                            |
|                      | SP-AAV-NcoI-N6H-F     | 5' ACC ATG GGC CAT CAT CAT CAT CAT CAC GCT GCT GTG GCT AAT TCC ATC GTCT 3'   |
| Δ117SP <sup>cm</sup> | SP-S/A-F              | 5' ACC CGT CCA GGG TGG GCA GGG ACA CCC CT 3'                                 |
|                      | SP-S/A-R              | 5' AGG GGT GTC CCT GCC CAC CCT GGA CGG GT 3'                                 |
|                      | SP-NCE-HindIII-R      | 5' GAA GCT TTC ATT CAC AGT TTG CAT GGA AAA TGG AGA GGT TCGT 3'               |
| Δ23Pro-C6H           | RG-SerP-E/S-Nco-F     | 5' CCA TGG TCC AGG ACT GCG GTG AGA GGG CTG CTA 3'                            |

**Table S2.** Data collection and refinement statistics.

|                                    | <b>Δ117 Pro</b><br>(PDB ID 6FEZ) | <b>Δ117 Pro-E/A-VPg</b><br>(PDB ID 6FFO) | <b>Δ117 Pro<sup>em</sup></b><br>(PDB ID 7YZV) |
|------------------------------------|----------------------------------|------------------------------------------|-----------------------------------------------|
| <b>Data collection</b>             |                                  |                                          |                                               |
| Space group                        | P 1 21 1                         | P 21 21 21                               | C 1 2 1                                       |
| Wavelength, Å                      | 0.9184                           | 0.96411                                  | 0.9184                                        |
| Unit cell dimensions, Å            |                                  |                                          |                                               |
| a, b, c (Å)                        | 37.11, 115.99, 57.92             | 38.94, 67.52, 74.08                      | 112.22 36.95 69.50                            |
| α, β, γ (°)                        | 90.00° 105.27° 90.00°            | 90.00° 90.00° 90.00°                     | 90.00° 126.29° 90.00°                         |
| Resolution, Å                      | 2.3 (2.30-2.42)                  | 2.1 (2.1-2.21)                           | 1.6 (1.60-1.68)                               |
| R <sub>merge</sub> , %             | 12.3 (54.8)                      | 7.7 (38)                                 | 14.8 (66)                                     |
| I/σ                                | 5.3 (2.1)                        | 13.9 (4.2)                               | 6.7 (2.2)                                     |
| Completeness, %                    | 95.98 (98.69)                    | 99.8 (99.8)                              | 95.9 (97.0)                                   |
| Redundancy                         | 3.0 (3.1)                        | 5.8 (5.9)                                | 5.7 (5.8)                                     |
| <b>Refinement</b>                  |                                  |                                          |                                               |
| Chains in asymmetric unit          | 2                                | 1                                        | 1                                             |
| Resolution (Å)                     | 57.99-2.3                        | 49.90-2.10                               | 56.02 – 1.60                                  |
| R <sub>work/free</sub> (%)         | 22.946/29.018                    | 17.623/23.481                            | 22.21/26.27                                   |
| No. of Rfree set (%)               | 5.1                              | 5.0                                      | 4.75                                          |
| Average B-factor (Å <sup>2</sup> ) | 45.366                           | 31.683                                   | 18.13                                         |
| R.m.s deviations                   |                                  |                                          |                                               |
| Bond lengths, Å                    | 0.016                            | 0.018                                    | 0.0053                                        |
| Bond angles, (°)                   | 1.976                            | 1.897                                    | 0.7979                                        |
| Ramachandran outliers, %           |                                  |                                          |                                               |
| Favored                            | 92                               | 95                                       | 96                                            |
| Allowed                            | 6                                | 5                                        | 4                                             |
| Outliers                           | 2                                | 0                                        | 0                                             |

The numbers in parentheses are for the highest-resolution shell.
